# Supplementary material
Source: PubMed Central journal article supplement (PMC4272679)
Supplement: NIHMS595510-supplement-Supp_Table_S1-S2.pdf [file NIHMS595510-supplement-Supp_Table_S1-S2.pdf]

**Table S1.** First Trimester Coffee and Tea Consumption and Risk of Recorded Gestational Diabetes Mellitus Using Cases Identified in Both the Registry and Self-Reported on 2<sup>nd</sup> or 3<sup>rd</sup> Interview Among 71,239 Participants in the Danish National Birth Cohort, 1996-2002.

| Cups/<br>day  | Overall<br>(n=71,239)     |        |                  |            |                | Stratified by Smoking Status |        |                  |            |                    |                           |        |                  |            |                |
|---------------|---------------------------|--------|------------------|------------|----------------|------------------------------|--------|------------------|------------|--------------------|---------------------------|--------|------------------|------------|----------------|
|               | GDM<br>Cases <sup>a</sup> | (%)    | aRR <sup>b</sup> | 95% CI     | P <sup>c</sup> | Non-Smokers (n=52,629)       |        |                  |            | Smokers (n=18,610) |                           |        |                  |            |                |
|               | GDM<br>Cases <sup>a</sup> | (%)    | aRR <sup>b</sup> | 95% CI     | P <sup>c</sup> | GDM<br>Cases <sup>a</sup>    | (%)    | aRR <sup>d</sup> | 95% CI     | P <sup>c</sup>     | GDM<br>Cases <sup>a</sup> | (%)    | aRR <sup>d</sup> | 95% CI     | P <sup>c</sup> |
| <b>Coffee</b> |                           |        |                  |            | .54            |                              |        |                  |            | .27                |                           |        |                  |            | .85            |
| 0             | 217                       | (0.55) | 1.00             | Referent   |                | 164                          | (0.51) | 1.00             | Referent   |                    | 53                        | (0.71) | 1.00             | Referent   |                |
| ½ – 3         | 126                       | (0.56) | 1.01             | 0.81, 1.26 |                | 88                           | (0.54) | 1.04             | 0.81, 1.34 |                    | 38                        | (0.61) | 0.95             | 0.62, 1.45 |                |
| 4 – 7         | 41                        | (0.59) | 0.84             | 0.60, 1.19 |                | 17                           | (0.47) | 0.77             | 0.47, 1.28 |                    | 24                        | (0.72) | 0.87             | 0.52, 1.43 |                |
| ≥8            | 20                        | (0.84) | 0.99             | 0.60, 1.63 |                | 9                            | (1.20) | 1.66             | 0.84, 3.26 |                    | 11                        | (0.67) | 0.68             | 0.35, 1.32 |                |
| <b>Tea</b>    |                           |        |                  |            | .76            |                              |        |                  |            | .49                |                           |        |                  |            | .89            |
| 0             | 176                       | (0.68) | 1.00             | Referent   |                | 113                          | (0.64) | 1.00             | Referent   |                    | 63                        | (0.76) | 1.00             | Referent   |                |
| ½ – 3         | 163                       | (0.51) | 0.88             | 0.71, 1.08 |                | 129                          | (0.51) | 0.92             | 0.71, 1.18 |                    | 34                        | (0.49) | 0.73             | 0.48, 1.10 |                |
| 4 – 7         | 54                        | (0.54) | 0.89             | 0.65, 1.21 |                | 30                           | (0.40) | 0.69             | 0.46, 1.03 |                    | 24                        | (1.02) | 1.41             | 0.87, 2.27 |                |
| ≥8            | 11                        | (0.36) | 0.50             | 0.27, 0.92 |                | 6                            | (0.29) | 0.44             | 0.19, 1.00 |                    | 5                         | (0.50) | 0.59             | 0.24, 1.48 |                |

Abbreviations: aRR, adjusted risk ratio; CI, confidence interval; GDM, gestational diabetes mellitus.

<sup>a</sup> GDM cases identified from Registry and self-reported on either DNBC interview (n=404).

<sup>b</sup> Model adjusted for coffee or tea consumption (categorical), as appropriate, age (categorical), socio-occupational status (categorical), parity (categorical), prepregnancy body mass index (categorical), smoking (categorical) and cola intake (categorical).

<sup>c</sup> Represents *P* for linear trend.

<sup>d</sup> Model adjusted for coffee or tea consumption (categorical), as appropriate, age (categorical), socio-occupational status (categorical), parity (categorical), prepregnancy body mass index (categorical), and cola intake (categorical).

**Table S2.** First Trimester Coffee and Tea Consumption and Risk of Recorded Gestational Diabetes Mellitus Using Cases Identified from the Registry Only Among 71,239 Participants in the Danish National Birth Cohort, 1996-2002.

| Cups/<br>day  | Overall<br>(n=71,239)     |        |                  |            |                       | Stratified by Smoking Status |        |                  |            |                       |                           |        |                  |            | <i>P</i> <sup>c</sup> |
|---------------|---------------------------|--------|------------------|------------|-----------------------|------------------------------|--------|------------------|------------|-----------------------|---------------------------|--------|------------------|------------|-----------------------|
|               | GDM<br>Cases <sup>a</sup> | (%)    | aRR <sup>b</sup> | 95% CI     | <i>P</i> <sup>c</sup> | Non-Smokers (n=52,629)       |        |                  |            | Smokers (n=18,610)    |                           |        |                  |            |                       |
|               | GDM<br>Cases <sup>a</sup> | (%)    | aRR <sup>b</sup> | 95% CI     | <i>P</i> <sup>c</sup> | GDM<br>Cases <sup>a</sup>    | (%)    | aRR <sup>d</sup> | 95% CI     | <i>P</i> <sup>c</sup> | GDM<br>Cases <sup>a</sup> | (%)    | aRR <sup>d</sup> | 95% CI     | <i>P</i> <sup>c</sup> |
| <b>Coffee</b> |                           |        |                  |            | .79                   |                              |        |                  |            | .23                   |                           |        |                  |            | .87                   |
| 0             | 288                       | (0.73) | 1.00             | Referent   |                       | 218                          | (0.68) | 1.00             | Referent   |                       | 70                        | (0.94) | 1.00             | Referent   |                       |
| ½ – 3         | 168                       | (0.75) | 1.03             | 0.85, 1.24 |                       | 119                          | (0.73) | 1.06             | 0.85, 1.32 |                       | 49                        | (0.79) | 0.95             | 0.66, 1.38 |                       |
| 4 – 7         | 58                        | (0.83) | 0.93             | 0.69, 1.24 |                       | 25                           | (0.68) | 0.86             | 0.57, 1.31 |                       | 33                        | (0.99) | 0.94             | 0.61, 1.43 |                       |
| ≥8            | 32                        | (1.34) | 1.23             | 0.83, 1.85 |                       | 16                           | (2.14) | 2.25             | 1.35, 3.75 |                       | 16                        | (0.98) | 0.77             | 0.47, 1.36 |                       |
| <b>Tea</b>    |                           |        |                  |            | .82                   |                              |        |                  |            | .84                   |                           |        |                  |            | .70                   |
| 0             | 231                       | (0.89) | 1.00             | Referent   |                       | 148                          | (0.84) | 1.00             | Referent   |                       | 83                        | (1.00) | 1.00             | Referent   |                       |
| ½ – 3         | 224                       | (0.70) | 0.94             | 0.79, 1.13 |                       | 177                          | (0.70) | 0.98             | 0.79, 1.22 |                       | 47                        | (0.68) | 0.79             | 0.55, 1.13 |                       |
| 4 – 7         | 75                        | (0.76) | 0.96             | 0.74, 1.25 |                       | 44                           | (0.58) | 0.78             | 0.55, 1.09 |                       | 31                        | (1.31) | 1.42             | 0.94, 2.16 |                       |
| ≥8            | 16                        | (0.52) | 0.57             | 0.34, 0.94 |                       | 9                            | (0.43) | 0.51             | 0.26, 0.99 |                       | 7                         | (0.70) | 0.65             | 0.30, 1.42 |                       |

Abbreviations: aRR, adjusted risk ratio; CI, confidence interval; GDM, gestational diabetes mellitus.

<sup>a</sup> GDM cases identified from Registry only (n=546).

<sup>b</sup> Model adjusted for coffee or tea consumption (categorical), as appropriate, age (categorical), socio-occupational status (categorical), parity (categorical), prepregnancy body mass index (categorical), smoking (categorical) and cola intake (categorical).

<sup>c</sup> Represents *P* for linear trend.

<sup>d</sup> Model adjusted for coffee or tea consumption (categorical), as appropriate, age (categorical), socio-occupational status (categorical), parity (categorical), prepregnancy body mass index (categorical), and cola intake (categorical).
